# Supplementary material
Source: publisher figshare collection journal article supplement (https://acs.figshare.com/ndownloader/files/3787732)
Supplement: Supplementary file 1 [file 3787732]

# Supporting Information

## Thin film transistor gas sensors incorporating high mobility diketopyrrolopyrole-based polymeric semiconductor doped with graphene oxide

*Kwang Hee Cheon,<sup>†</sup> Jangwhan Cho,<sup>†</sup> Yun-Hi Kim<sup>\*,‡</sup> and Dae Sung Chung<sup>\*,†</sup>*

<sup>†</sup> School of Chemical Engineering and Material Science, Chung-Ang University, Seoul 156-756, Korea

<sup>‡</sup> Department of Chemistry and ERI, Gyeongsang National University, Jinju 660-701, Korea

### **Corresponding Authors**

E-mail: [dchung@cau.ac.kr](mailto:dchung@cau.ac.kr) and [ykim@gnu.ac.kr](mailto:ykim@gnu.ac.kr)

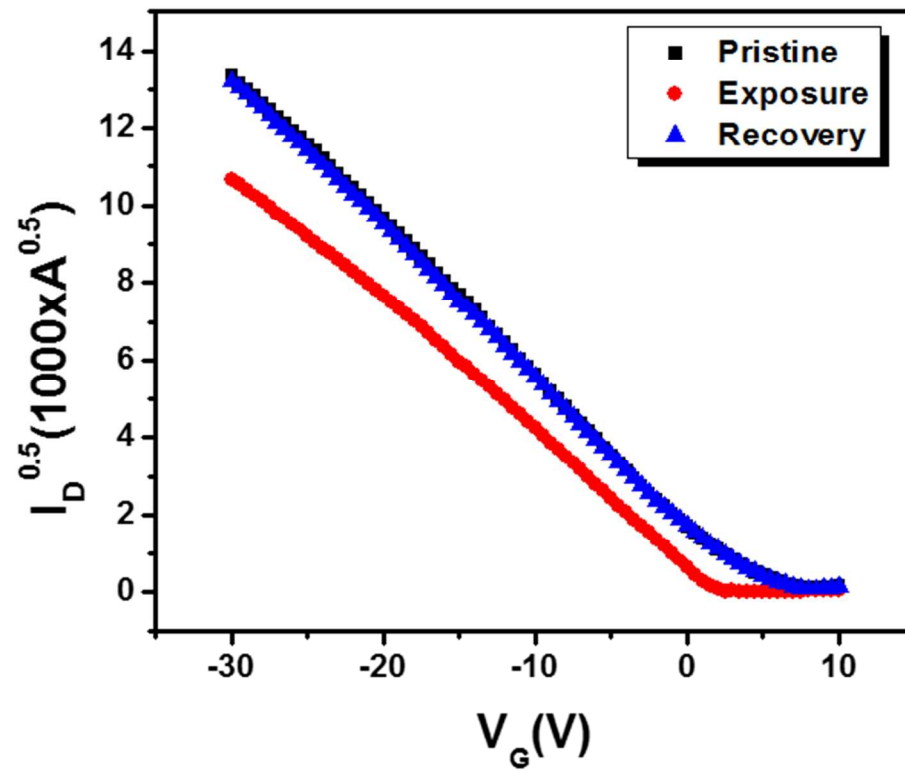

**Figure S1.** Transfer curves of annealed film with GO 1% content under the ethanol exposure

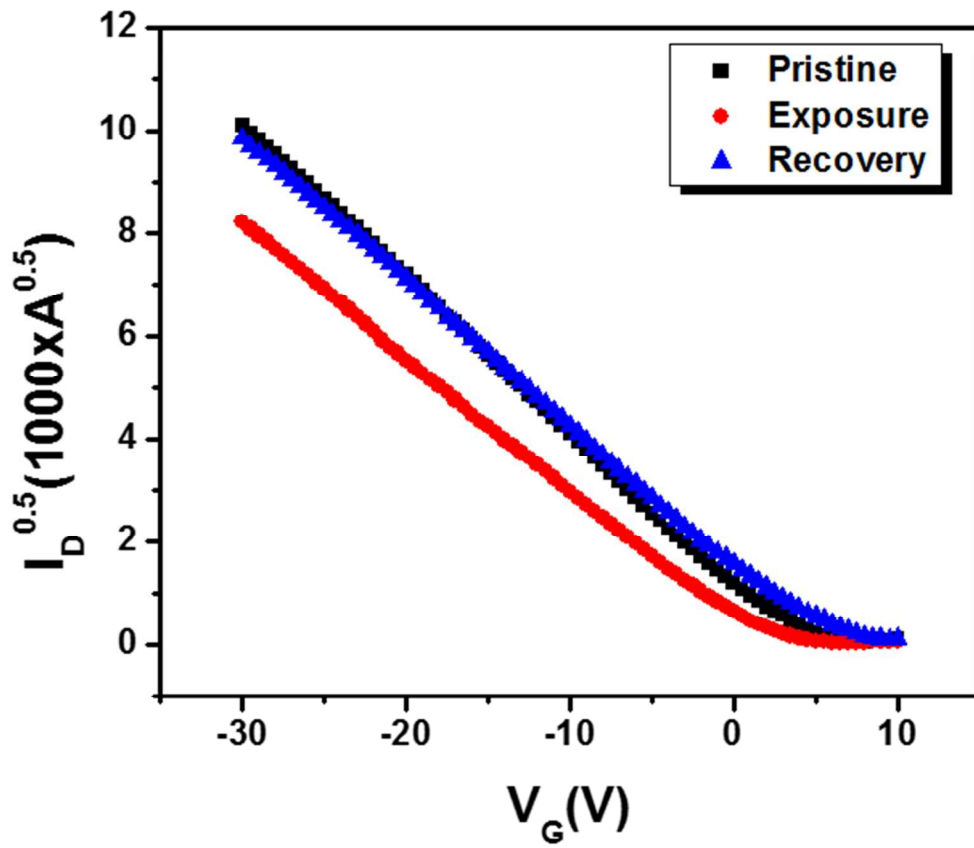

**Figure S2.** Transfer curves of composite film with GO content of 10% under the ethanol exposure
